# Supplementary material for: Biomarkers of Oncogenesis, Adipose Tissue Dysfunction and Systemic Inflammation for the Detection of Hepatocellular Carcinoma in Patients with Nonalcoholic Fatty Liver Disease
Source: MDPI journal article supplement (doi:10.3390/cancers13102305), 2021-05-11
Supplement: s1 [file s1]

Supplementary Materials

**Table S1.** Median biomarkers values according to the different stages of liver disease.

| Biomarkers                      | Controls          |                  | HCC                |                         | <i>p</i> -Value |
|---------------------------------|-------------------|------------------|--------------------|-------------------------|-----------------|
|                                 | Advanced Fibrosis | Cirrhosis        | Early (BCLC = 0/A) | Advanced (BCLC = B/C/D) |                 |
| AFP (ng/mL), median IQR         | 3.0 (2.0–3.8)     | 4.2 (3.5–5.4)    | 5.0 (3.7–8.6)      | 7.8 (5.7–36.7)          | <0.001          |
| PIVKA-II (mAU/mL), median IQR   | 33 (27–47)        | 33 (28–44)       | 74 (45–204)        | 658 (145–2144)          | <0.001          |
| GPC-3 (pg/mL), median IQR       | 27 (17–40)        | 43 (20–71)       | 73 (39–101)        | 80 (40–108)             | <0.001          |
| Adiponectin (µg/mL), median IQR | 1.79 (1.21–3.01)  | 2.42 (1.47–3.54) | 4.64 (2.64–6.62)   | 5.54 (3.03–10.11)       | <0.001          |
| Leptin (ng/mL), median IQR      | 15.5 (5.9–28.3)   | 26.3 (15.4–37.7) | 19.5 (13.5–31.2)   | 20.4 (9.4–56.6)         | 0.020           |
| IL-6 (pg/mL), median IQR        | 2.9 (1.8–4.6)     | 3.3 (2.5–7.0)    | 5.8 (3.8–11.3)     | 9.5 (4.6–18.5)          | <0.001          |

*p* values were calculated by Kruskal-Wallis test. Abbreviations—alpha-fetoprotein (AFP), Barcelona Clinic Liver Cancer (BCLC), glypican 3 (GPC3), hepatocellular carcinoma (HCC), interquartile range (IQR), interleukin-6 (IL-6).

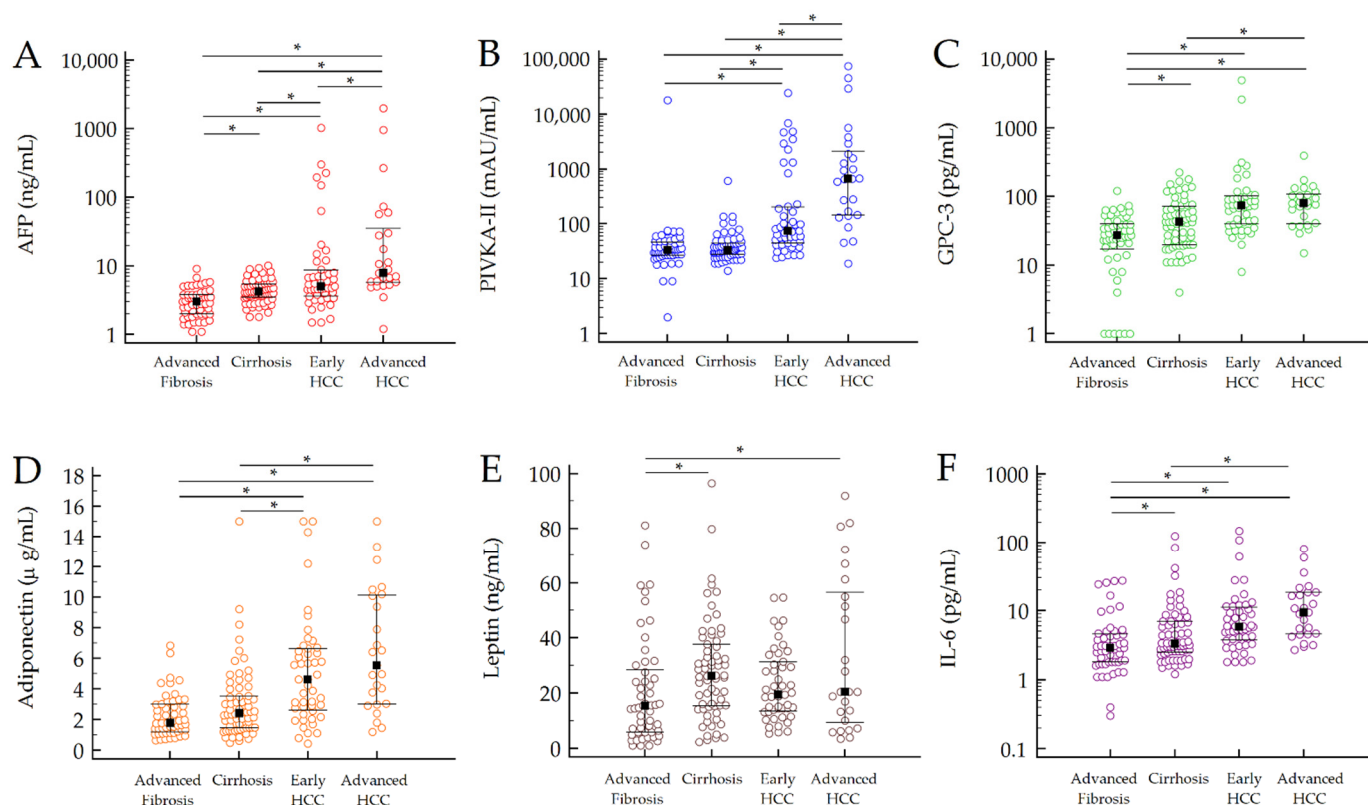

**Figure S1.** Median values of AFP (A), PIVKA-II (B), GPC-3 (C), adiponectin (D), leptin (E) and IL-6 (F) according to the different stages of liver disease. \**p* < 0.05; *p* values have been calculated by Mann-Whitney test. Black squares and error bars represent respectively the median value and the IQR in each group of patients. The values of AFP, PIVKA-II, GPC-3 and IL-6 have been depicted in Log scale due to data skewness. Abbreviations—alpha-fetoprotein (AFP), Barcelona Clinic Liver Cancer (BCLC), glypican 3 (GPC3), hepatocellular carcinoma (HCC), interquartile range (IQR), interleukin-6 (IL-6), protein induced by vitamin K absence or antagonist II (PIVKA-II).

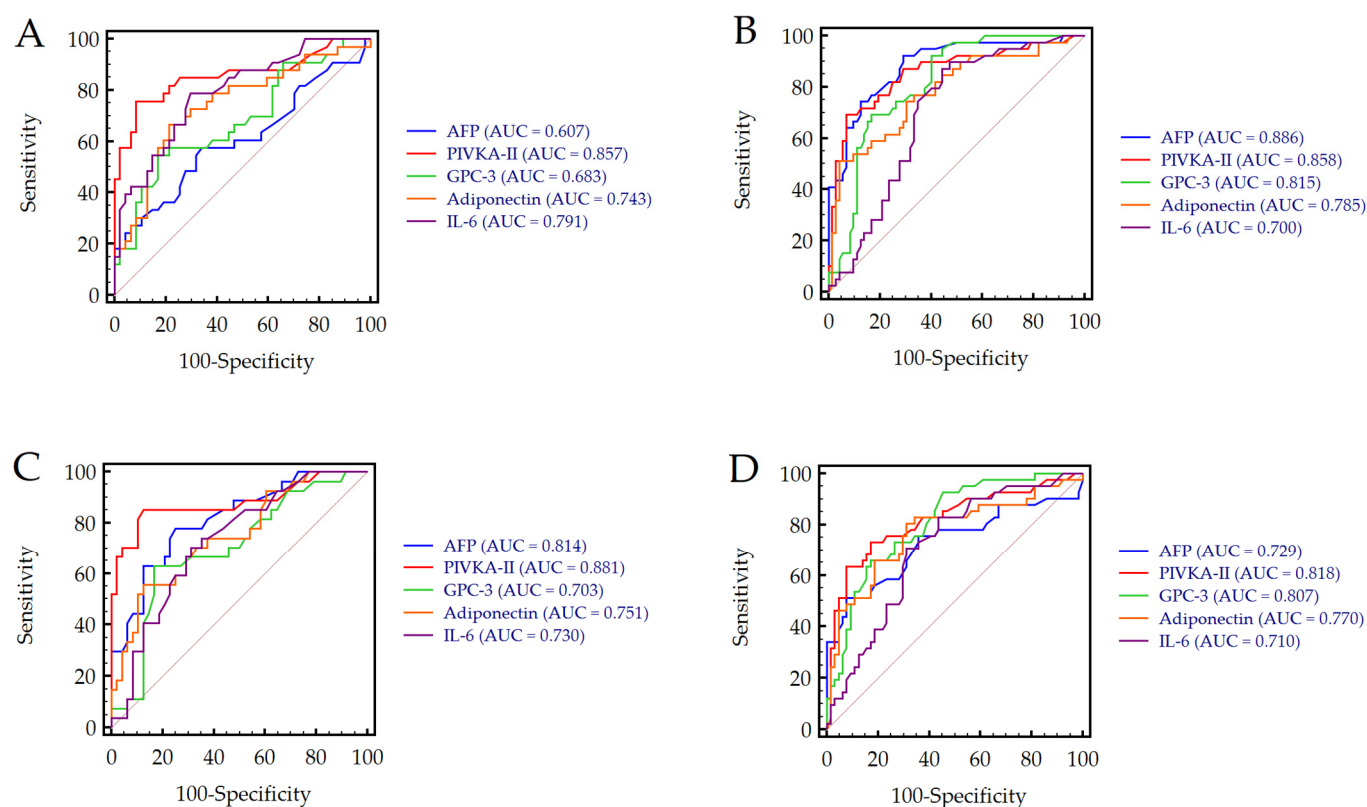

**Figure S2.** Diagnostic accuracy of AFP, PIVKA-II, GPC-3, adiponectin and IL-6 for the detection of HCC in lean (A) and obese patients (B), and in normal-glucose tolerant (C) and diabetic patients (D). Abbreviations—alpha-fetoprotein (AFP), glypican 3 (GPC3), hepatocellular carcinoma (HCC), interleukin-6 (IL-6), protein induced by vitamin K absence or antagonist-II (PIVKA-II).

**Table S2.** Comparison of the diagnostic accuracy of AFP, PIVKA-II, GPC-3, adiponectin and IL-6 for the detection of HCC.

| Biomarkers  | AFP                                 | PIVKA-II                            | GPC-3                               | Adiponectin                         | IL-6                                |
|-------------|-------------------------------------|-------------------------------------|-------------------------------------|-------------------------------------|-------------------------------------|
| AFP         |                                     | $\Delta$ AUC = 0.090<br>$p = 0.044$ | $\Delta$ AUC = 0.004<br>$p = 0.918$ | $\Delta$ AUC = 0.007<br>$p = 0.888$ | $\Delta$ AUC = 0.032<br>$p = 0.513$ |
| PIVKA-II    | $\Delta$ AUC = 0.090<br>$p = 0.044$ |                                     | $\Delta$ AUC = 0.094<br>$p = 0.035$ | $\Delta$ AUC = 0.083<br>$p = 0.075$ | $\Delta$ AUC = 0.122<br>$p = 0.009$ |
| GPC-3       | $\Delta$ AUC = 0.004<br>$p = 0.918$ | $\Delta$ AUC = 0.094<br>$p = 0.035$ |                                     | $\Delta$ AUC = 0.011<br>$p = 0.818$ | $\Delta$ AUC = 0.028<br>$p = 0.575$ |
| Adiponectin | $\Delta$ AUC = 0.007<br>$p = 0.888$ | $\Delta$ AUC = 0.083<br>$p = 0.075$ | $\Delta$ AUC = 0.011<br>$p = 0.818$ |                                     | $\Delta$ AUC = 0.039<br>$p = 0.423$ |
| IL-6        | $\Delta$ AUC = 0.032<br>$p = 0.513$ | $\Delta$ AUC = 0.122<br>$p = 0.009$ | $\Delta$ AUC = 0.028<br>$p = 0.575$ | $\Delta$ AUC = 0.039<br>$p = 0.423$ |                                     |

Abbreviations—alpha-fetoprotein (AFP), glypican 3 (GPC3), interleukin-6 (IL-6).

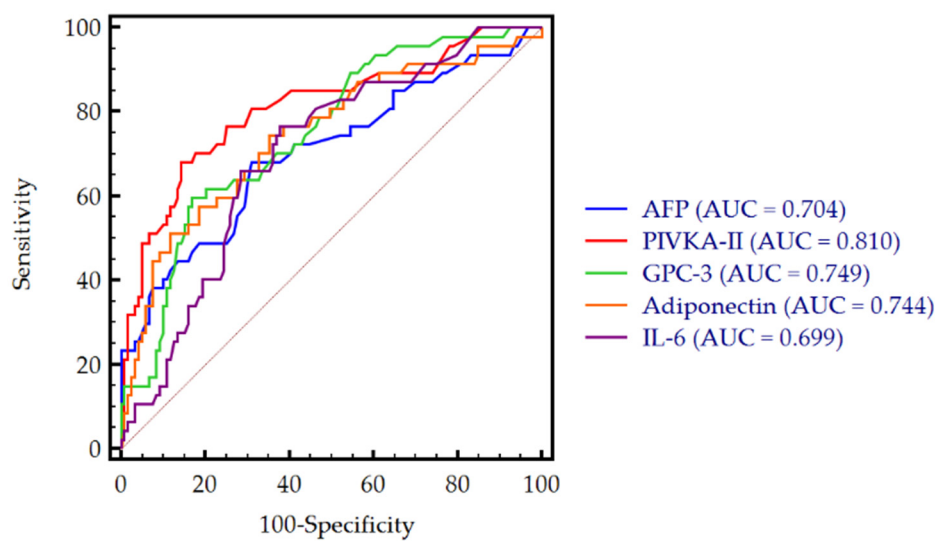

**Figure S3.** Diagnostic accuracy of AFP, PIVKA-II, GPC-3, adiponectin and IL-6 for the detection of early HCC. Abbreviations—alpha-fetoprotein (AFP), glypican 3 (GPC3), hepatocellular carcinoma (HCC), interleukin-6 (IL-6), protein induced by vitamin K absence or antagonist-II (PIVKA-II).
